# Supplementary material for: Colorimetric glucose sensing with multiple-color changes by using a MnO2NSs–TMB nanosystem
Source: Royal Society of Chemistry journal article supplement (doi:10.1039/d0ay02184a), 2020-12-22
Supplement: d0ay02184a1.pdf [file d0ay02184a1.pdf]

## Supporting Information for

### **Colorimetric glucose sensing with multiple-color changes by using MnO<sub>2</sub> NSs-TMB nanosystem**

Rui Qian<sup>a</sup>, Dan Gao<sup>a, \*</sup>, Liping Liu<sup>b</sup>, Yuyang Jiang<sup>c</sup>

<sup>a</sup> State Key Laboratory of Chemical Oncogenomics, Graduate School at Shenzhen,  
Tsinghua University, Shenzhen, Guangdong 518055, China

<sup>b</sup> Department of Hepatobiliary and Pancreatic Surgery, Shenzhen People's Hospital,  
Second Clinical Medical College of Jinan University, 1017 North of Dongmen Road,  
Shenzhen, Guangdong Province, 518000, China

<sup>c</sup> School of Pharmaceutical Sciences, Tsinghua University, Beijing, 100084, China

---

---

\* Corresponding author. State Key Laboratory of Chemical Oncogenomics, Graduate School at Shenzhen, Tsinghua University, Shenzhen, Guangdong, 518055, China. E-mail addresses: gao.dan@sz.tsinghua.edu.cn

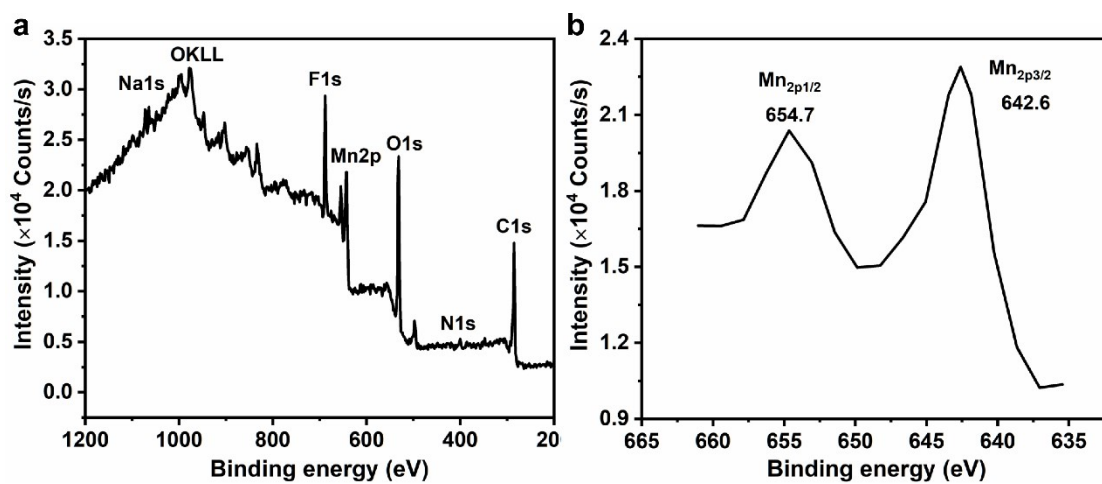

**Fig S1.** XPS assay of BSA-templated MnO<sub>2</sub> NSs. (a) The XPS pattern of MnO<sub>2</sub> NSs. (b) The XPS pattern of Mn 2p.

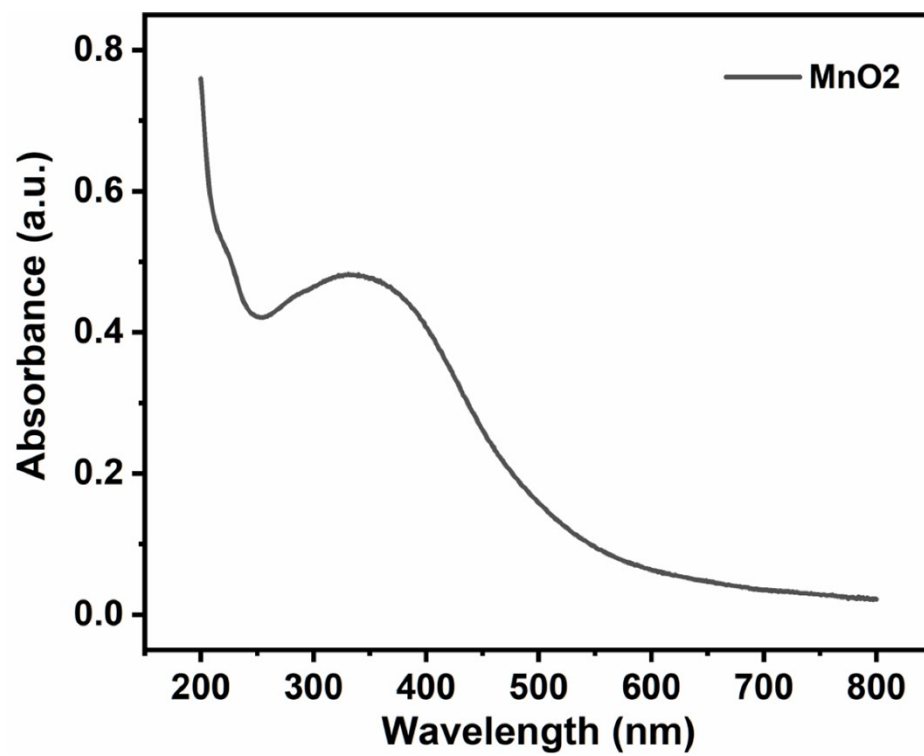

Fig S2. UV-vis absorbance of MnO<sub>2</sub> NSs.

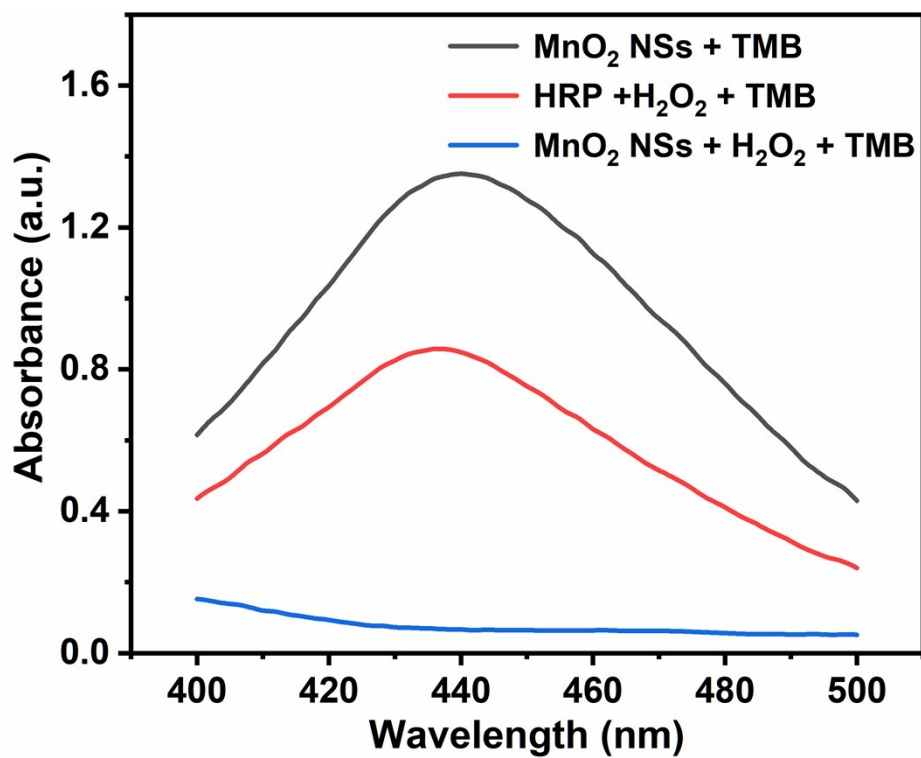

**Fig S3.** Verification of the peroxidase activity and oxidase-like activity of MnO<sub>2</sub> NSs. The concentrations of H<sub>2</sub>O<sub>2</sub> were 5 mM, HRP (100 ug/mL), MnO<sub>2</sub> NSs (0.02 M) and the TMB (0.5 mM).
